# Supplementary material for: Circular RNA- and microRNA-Mediated Post-Transcriptional Regulation of Preadipocyte Differentiation in Adipogenesis: From Expression Profiling to Signaling Pathway
Source: MDPI journal article supplement (doi:10.3390/ijms24054549), 2023-02-25
Supplement: s1 [file s1]

**Suppl. Table S1.** Expression of circRNAs in WAT and BAT of the human and animals on preadipocyte differentiation (based on reference [51])

| No.                                                                          | Host gene                   | Mouse WAT-1 <sup>a</sup>            | Mouse WAT-2                | Human WAT | Yak WAT                     | Mouse BAT                  |
|------------------------------------------------------------------------------|-----------------------------|-------------------------------------|----------------------------|-----------|-----------------------------|----------------------------|
|                                                                              | Zhang PP et al. (2021) [51] |                                     | Arcinas et al. (2019) [49] |           | Zhang Y et al., (2020) [53] | Zhang P et al. (2021) [52] |
| (A) Up-regulated circRNAs on differentiation (from high to low) <sup>b</sup> |                             |                                     |                            |           |                             |                            |
| 1                                                                            | Acss3                       | mmu_circ_Acss3_1                    | 3+                         | +         | +                           | 4+                         |
| 2                                                                            | NA                          | chr17:34872348-34952518             | -                          | -         | -                           | +                          |
| 3                                                                            | Acss3                       | mmu_circ_Acss3_2                    | 3+                         | +         | +                           | 4+                         |
| 4                                                                            | Mlxipl                      | mmu_circ_Mlxipl                     | +                          | -         | -                           | +                          |
| 5                                                                            | NA                          | chr17:34877211-34956589             | -                          | -         | -                           | -                          |
| 6                                                                            | Pcsk5                       | mmu_circ_0000937 (mmu_circ_Pcsk5)   | +                          | +         | 2+                          | +                          |
| 7                                                                            | Bmper                       | mmu_circ_0015472_1 (mmu_circ_Bmper) | -                          | +         | -                           | +                          |
| 8                                                                            | Nfia                        | mmu_circ_Nfia                       | +                          | +         | -                           | +                          |
| 9                                                                            | Cacna1d                     | mmu_circ_0005172 (mmu_circ_Cacna1d) | -                          | -         | -                           | -                          |
| 10                                                                           | Fkbp5                       | mmu_circ_Fkbp5                      | -                          | -         | 8+                          | +                          |
| 11                                                                           | Bmper                       | mmu_circ_0015472_2 (mmu_circ_Bmper) | -                          | +         | -                           | +                          |
| 12                                                                           | Selenbp1                    | mmu_circ_Selenbp1                   | +                          | -         | -                           | +                          |
| 13                                                                           | Zbtb16                      | mmu_circ_Zbtb16                     | 3+                         | +         | 2+                          | 2+                         |
| 14                                                                           | Ror1                        | mmu_circ_Ror1                       | -                          | +         | 2+                          | +                          |
| 15                                                                           | Egfr                        | mmu_circ_0002861 (mmu_circ_Egfr)    | +                          | -         | -                           | +                          |
| 16                                                                           | Tgfbr2                      | mmu_circ_0001853 (mmu_circ_Tgfbr2)  | +                          | 3+        | 2+                          | +                          |
| 17                                                                           | Cped1                       | mmu_circ_0001447 (mmu_circ_Cped1)   | -                          | +         | 7+                          | +                          |
| 18                                                                           | Fndc3b                      | mmu_circ_0010609 (mmu_circ_Fndc3b)  | 2+                         | 9+        | 5+                          | +                          |
| 19                                                                           | Slc10a7                     | mmu_circ_Slc10a7                    | 3+                         | -         | -                           | +                          |
| 20                                                                           | Gbe1                        | mmu_circ_0006376 (mmu_circ_Gbe1)    | 3+                         | 3+        | -                           | +                          |
| 21                                                                           | Pcsk5                       | mmu_circ_0000938 (mmu_circ_Pcsk5)   | +                          | +         | 2+                          | +                          |
| 22                                                                           | Bckdhb                      | mmu_circ_0001822 (mmu_circ_Bckdhb)  | 7+                         | -         | -                           | 2+                         |

|                                                                                      |          |                                        |     |    |    |    |
|--------------------------------------------------------------------------------------|----------|----------------------------------------|-----|----|----|----|
| 23                                                                                   | Arhgap10 | mmu_circ_Arhgap10_1                    | 10+ | 9+ | 2+ | +  |
| 24                                                                                   | Arhgap10 | mmu_circ_Arhgap10_2                    | 10+ | 9+ | 2+ | +  |
| 25                                                                                   | Fanc1    | mmu_circ_0000248<br>(mmu_circ_Fanc1)   | +   | 2+ | -  | -  |
| 26                                                                                   | Acvr2a   | mmu_circ_0001017<br>(mmu_circ_Acvr2a)  | +   | +  | 2+ | +  |
| 27                                                                                   | Med13l   | mmu_circ_0001396<br>(mmu_circ_Med13l)  | 2+  | 2+ | 2+ | +  |
| 28                                                                                   | Marchf3  | mmu_circ_0007399<br>(mmu_circ_Marchf3) | +   | -  | -  | +  |
| <b>(B) Down-regulated circRNA during adipogenesis (from high to low)<sup>b</sup></b> |          |                                        |     |    |    |    |
| 1                                                                                    | Pdlim5   | mmu_circ_Pdlim5                        | +   | 6+ | 6+ | +  |
| 2                                                                                    | Slc7a11  | mmu_circ_0010676<br>(mmu_circ_Slc7a11) | -   | -  | +  | +  |
| 3                                                                                    | Rad18    | mmu_circ_0001504<br>(mmu_circ_Rad18)   | -   | +  | 3+ | -  |
| 4                                                                                    | Megf8    | mmu_circ_0014097<br>(mmu_circ_Megf8)   | -   | -  | -  | -  |
| 5                                                                                    | Trpc6    | mmu_circ_0001743<br>(mmu_circ_Trpc6)   | -   | -  | -  | -  |
| 6                                                                                    | Cacna1c  | mmu_circ_0001511<br>(mmu_circ_Cacna1c) | -   | -  | -  | 3+ |
| 7                                                                                    | Nsd2     | mmu_circ_0001335<br>(mmu_circ_Nsd2)    | -   | -  | -  | +  |
| 8                                                                                    | Zfp532   | mmu_circ_0000884<br>(mmu_circ_Zfp532)  | 2+  | -  | -  | -  |
| 9                                                                                    | Dcbld2   | mmu_circ_0000693<br>(mmu_circ_Dcbld2)  | +   | +  | 4+ | -  |
| 10                                                                                   | Tulp4    | mmu_circ_0000723<br>(mmu_circ_Tulp4)   | 4+  | -  | -  | +  |
| 11                                                                                   | Zbtb38   | mmu_circ_Zbtb38                        | -   | -  | -  | +  |
| 12                                                                                   | Pde4d    | mmu_circ_0004451<br>(mmu_circ_Pde4d)   | -   | +  | -  | 2+ |
| 13                                                                                   | Zfx      | mmu_circ_0016408<br>(mmu_circ_Zfx)     | +   | +  | +  | -  |

<sup>a</sup>CircRNAs in host-name nomenclature are provided in brackets below the circBase ID whenever available; NA, not available. <sup>b</sup>The circRNAs are in the order of decreasing expression levels based on the mouse WAT-1 dataset of Zhang PP et al. 2021 [51]. Note that circRNAs Acss3 (rows 1 & 3), Pcsk5 (6 & 21), Bmper (7 & 11) and Arhgap10 (23 & 24) each shows two different isoforms in the dataset. The number of isoforms in the circRNA datasets reported in other studies are shown by the number of “+”; “-” indicates not found in the dataset.

**Suppl. Table S2.** Molecular features of the selected adipogenesis-associated circRNAs

| Host gene     | Species | circRNA        | circBase ID      | Exons | Size (nt) | Best transcript | Chromosomal location     |
|---------------|---------|----------------|------------------|-------|-----------|-----------------|--------------------------|
| PPAR $\gamma$ | Cattle  | bta_circPpary  | bta-circ-0010660 | 3-5   | 509       | NM_181024       | Chr22: 56710574-56775806 |
| FLT1          | Cattle  | bta_circFlt1   | bta_circ_002673  | 2-3   | 327       | XM_027557508    | Chr12: 31656945-31657867 |
| FUT10         | Cattle  | bta_circFut10  | NA               | 2     | 295       | NM_182987       | Chr27: 16348184-16348478 |
| SAMD4A        | Human   | hsa_circSAMD4A | hsa_circ_0004846 | 3     | 519       | NM_015589       | Chr14: 55168779-55169298 |

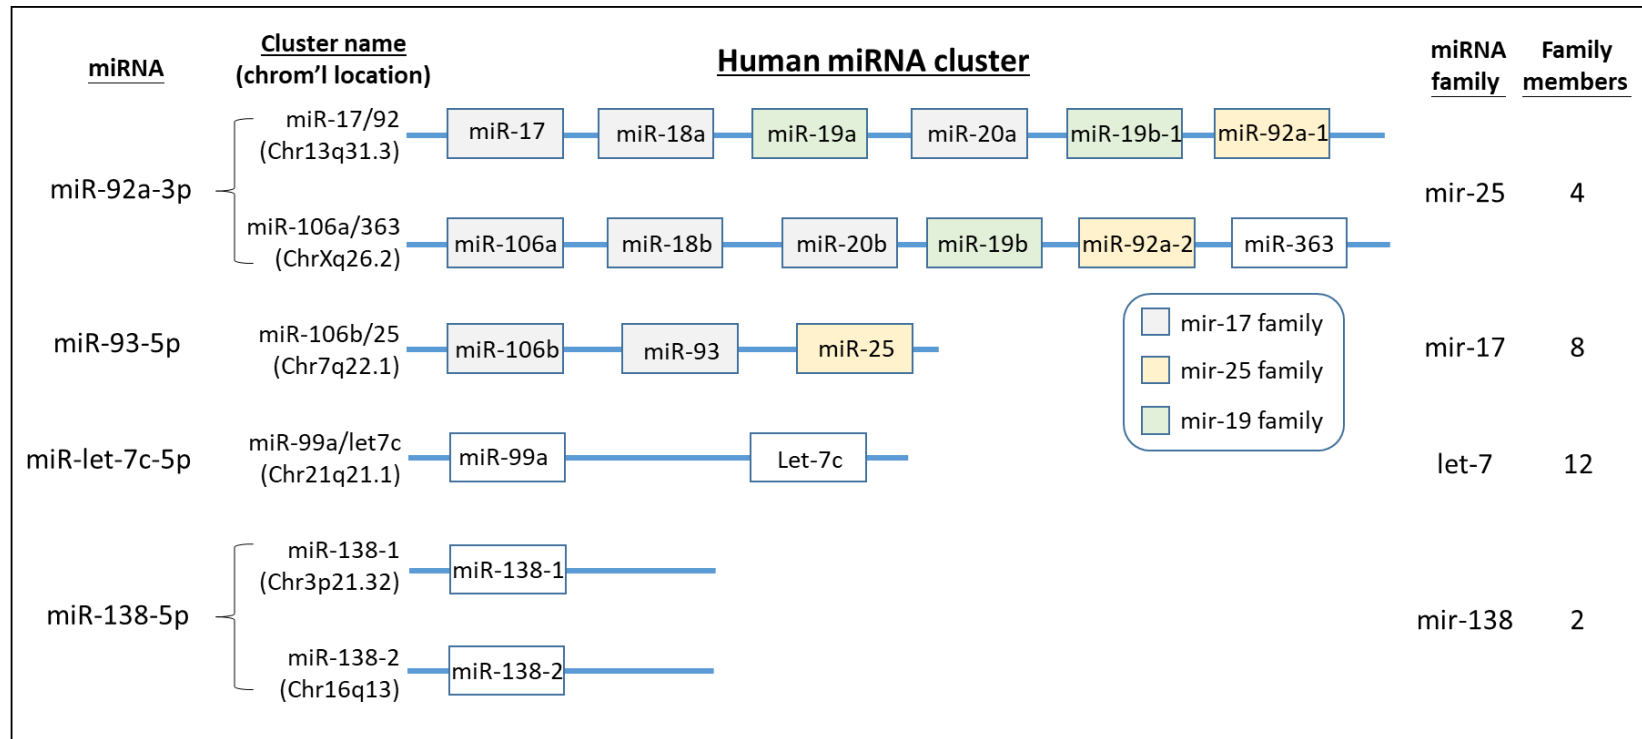

**Suppl. Figure S1.** MiRNA families and clusters.
